# Supplementary material for: Understanding the Saffron Corm Development—Insights into Histological and Metabolic Aspects
Source: MDPI journal article supplement (doi:10.3390/plants13081125), 2024-04-17
Supplement: s1 [file s1]

Supplemental Table S1. Temperature values during saffron cultivation

A) Temperature values in the experimental field

|          | Mean<br>Temperature<br>(°C) | Mean Min.<br>Temperature<br>(°C) | Mean Max.<br>Temperature<br>(°C) |
|----------|-----------------------------|----------------------------------|----------------------------------|
| October  | 22.4                        | 14.5                             | 27.8                             |
| November | 15.8                        | 7.2                              | 21.1                             |
| December | 12.4                        | 3.7                              | 17.5                             |
| January  | 14.1                        | 6.0                              | 17.8                             |
| February | 14.2                        | 6.1                              | 18.3                             |
| March    | 14.8                        | 6.3                              | 20.0                             |
| April    | 18.7                        | 10.7                             | 24.3                             |
| May      | 19.5                        | 12.2                             | 24.6                             |

B) Temperature values in the greenhouse

| Date     | Mean<br>Temperature<br>(°C) | Mean Min.<br>Temperature<br>(°C) | Mean Max.<br>Temperature<br>(°C) |
|----------|-----------------------------|----------------------------------|----------------------------------|
| October  | 23.2                        | 18.6                             | 29.2                             |
| November | 19.4                        | 14.4                             | 27.4                             |
| December | 18.4                        | 13.3                             | 27.4                             |
| January  | 18.8                        | 12.8                             | 28.1                             |
| February | 20.2                        | 14.4                             | 28.3                             |
| March    | 22.6                        | 15.2                             | 32.6                             |
| April    | 22.1                        | 14.8                             | 29.4                             |
| May      | 23.6                        | 17.1                             | 30.3                             |
