# Supplementary material for: Understanding the Saffron Corm Development—Insights into Histological and Metabolic Aspects
Source: MDPI journal article supplement (doi:10.3390/plants13081125), 2024-04-17
Supplement: s1 [file s1]

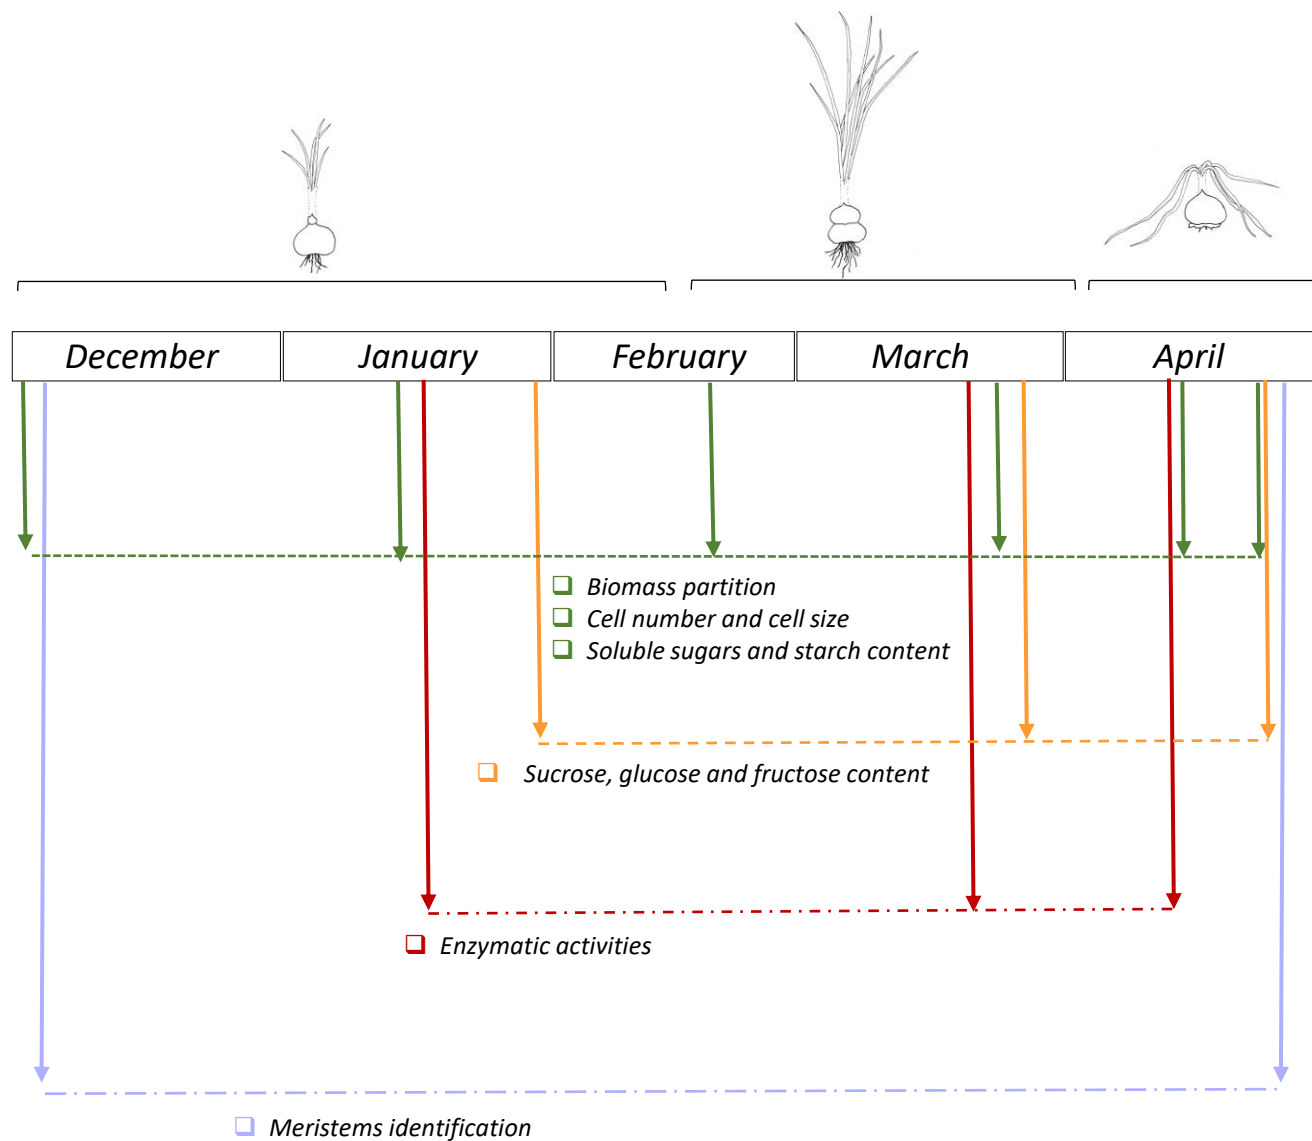

Figure S2. Summary diagram showing the analyzed characters and corresponding sampling dates across the different experiments conducted in this study.
