# Supplementary material for: Understanding the Saffron Corm Development—Insights into Histological and Metabolic Aspects
Source: MDPI journal article supplement (doi:10.3390/plants13081125), 2024-04-17

Figure S1. Appearance of saffron plants on the different dates when samples were collected for enzymatic analysis. Scale bars = 1cm

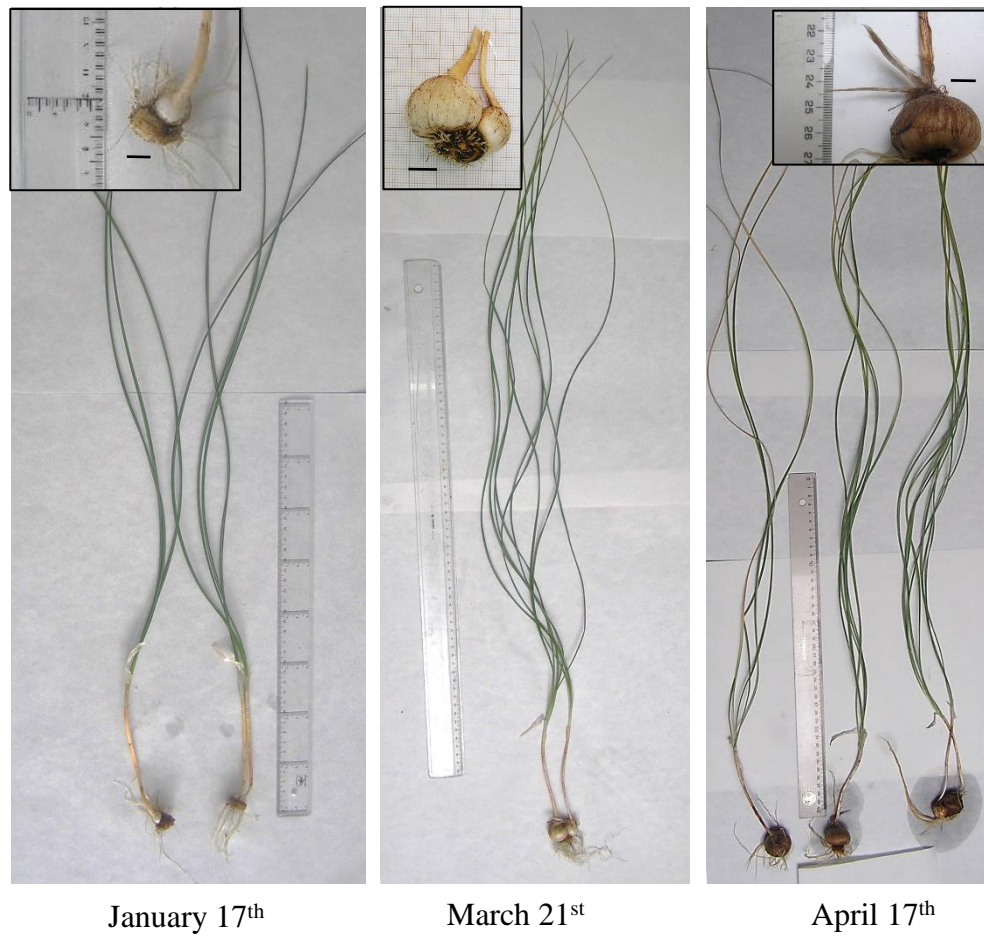

Supplement: s1 [file s1]
