# Supplementary material for: Understanding the Saffron Corm Development—Insights into Histological and Metabolic Aspects
Source: MDPI journal article supplement (doi:10.3390/plants13081125), 2024-04-17

Figure S4. Percentage of total metabolizable soluble sugars [SS] (A) and starch (B) on the different organs of saffron (daughter corm, DC; mother corm, MC and leaves, LFs) during the vegetative period. Values are averages of three independent samples. Within each graph, different letters indicate significant differences ( $P < 0.05$ ) between organs for each date.

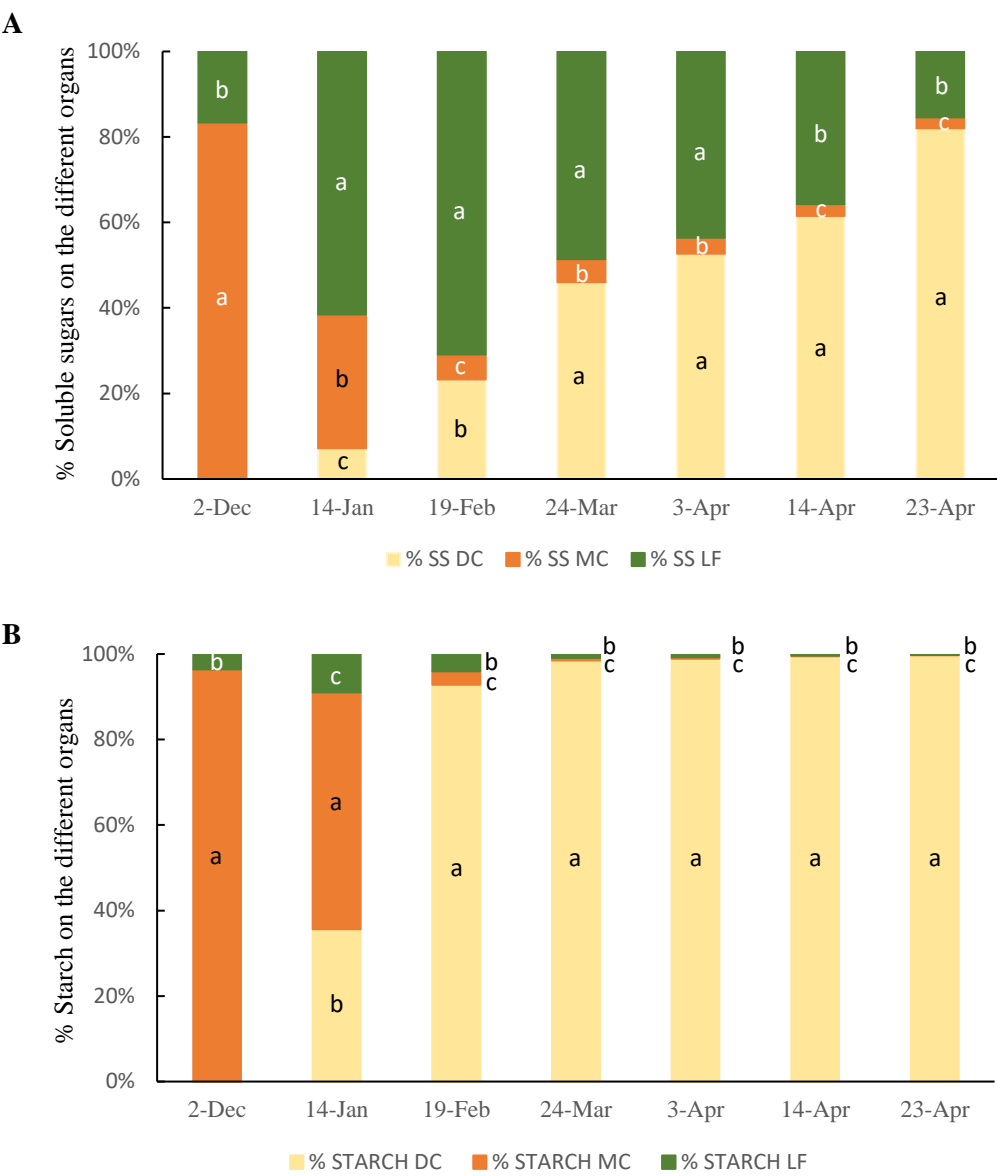

Supplement: s1 [file s1]
